# Supplementary material for: The evolution of non-small cell lung cancer metastases in TRACERx
Source: Springer Nature journal article supplement (doi:10.1038/s41586-023-05729-x), 2023-04-12
Supplement: MOESM1 [file 41586_2023_5729_MOESM1_ESM.pdf]

## The evolution of non-small cell lung cancer metastases in TRACERx

Al Bakir, Maise; Naidu, Babu; Middleton, Gary; Jamal-Hanjani, Mariam; McGranahan, Nicholas; Swanton, Charles

DOI:

[10.1038/s41586-023-05729-x](https://doi.org/10.1038/s41586-023-05729-x)

License:

Creative Commons: Attribution (CC BY)

### Document Version

Publisher's PDF, also known as Version of record

### Citation for published version (Harvard):

Al Bakir, M, Naidu, B, Middleton, G, Jamal-Hanjani, M, McGranahan, N & Swanton, C 2023, 'The evolution of non-small cell lung cancer metastases in TRACERx', *Nature*, vol. 616, no. 7957, pp. 534-542. <https://doi.org/10.1038/s41586-023-05729-x>

[Link to publication on Research at Birmingham portal](#)

### General rights

Unless a licence is specified above, all rights (including copyright and moral rights) in this document are retained by the authors and/or the copyright holders. The express permission of the copyright holder must be obtained for any use of this material other than for purposes permitted by law.

- Users may freely distribute the URL that is used to identify this publication.
- Users may download and/or print one copy of the publication from the University of Birmingham research portal for the purpose of private study or non-commercial research.
- User may use extracts from the document in line with the concept of 'fair dealing' under the Copyright, Designs and Patents Act 1988 (?)
- Users may not further distribute the material nor use it for the purposes of commercial gain.

Where a licence is displayed above, please note the terms and conditions of the licence govern your use of this document.

When citing, please reference the published version.

### Take down policy

While the University of Birmingham exercises care and attention in making items available there are rare occasions when an item has been uploaded in error or has been deemed to be commercially or otherwise sensitive.

If you believe that this is the case for this document, please contact [UBIRA@lists.bham.ac.uk](mailto:UBIRA@lists.bham.ac.uk) providing details and we will remove access to the work immediately and investigate.

**Supplementary information**

---

**The evolution of non-small cell lung cancer metastases in TRACERx**

---

In the format provided by the  
authors and unedited

## Supplementary Note

### Table of Contents

Orthogonal implementation for dissemination

2

## Orthogonal implementation for dissemination

As an orthogonal approach to characterise dissemination patterns, we implemented the published tool MACHINA<sup>1</sup> (Methods: *Inferring metastatic migration patterns*). We observed that for 90% (114/126) of tumours, the dissemination patterns were concordant with our approach (Extended Figure 5h). For the cases with disparate dissemination classifications (12/126), MACHINA defined the dissemination patterns as polyclonal while our approach defined the cases as monoclonal (Extended Figure 5h). This is consistent with our method being conservative and can be traced back to differing assumptions of the two methods; MACHINA assumes no metastasis specific clones can exist, therefore the clone(s) must have been missed within the primary. This can lead to multiple seeding events being inferred. In fact, when relaxing the hypothesis to allow for seeding from sources other than the primary, all 12 cases (100%) where the classifications differed, were predicted with MACHINA to have a metastasis being seeded by another metastatic region compared to only 6 out of the remaining 114 cases (5.3%). Conversely, our method for determining the mode of dissemination (Methods: *Classifying dissemination patterns*) allows for metastasis specific clones and predicts the seeding event to occur prior to this.

## References

1. El-Kebir, M., Satas, G. & Raphael, B. J. Inferring parsimonious migration histories for metastatic cancers. *Nat. Genet.* **50**, 718–726 (2018).
